# Supplementary material for: Synchrotron Radiation Spectroscopy and Transmission Electron Microscopy Techniques to Evaluate TiO2 NPs Incorporation, Speciation, and Impact on Root Cells Ultrastructure of Pisum sativum L. Plants
Source: PubMed Central journal article supplement (PMC8066591; doi:10.3390/nano11040921), 2021-04-04
Supplement: nanomaterials-11-00921-s001.pdf [file nanomaterials-11-00921-s001.pdf]

**Synchrotron radiation spectroscopy and transmission electron microscopy techniques to evaluate TiO<sub>2</sub> NPs incorporation, speciation and impact on root cells ultrastructure of *Pisum sativum* L. plants**

Simonetta Muccifora<sup>1</sup>, Hiram Castillo-Michel<sup>2</sup>, Francesco Barbieri<sup>1</sup>, Lorenza Bellani<sup>1,3</sup>, Monica Ruffini Castiglione<sup>4</sup>, Carmelina Spanò<sup>4</sup>, Ana E. Pradas del Real<sup>2</sup>, Lucia Giorgetti<sup>3</sup>, Eliana L. Tassi<sup>5\*</sup>

<sup>1</sup> Department of Life Sciences, University of Siena, Via A. Moro 2, 53100 Siena, Italy

<sup>2</sup> European Synchrotron Radiation Facility, Beamline ID21, 38100 71 Av. Rue des Martyrs 38000 Grenoble, France;

<sup>3</sup> Department of Biology, University of Pisa, Via Ghini 13, 56126 Pisa, Italy

<sup>4</sup> Institute of Agricultural Biology and Biotechnology, National Research Council, Via Moruzzi 1, 56124 Pisa, Italy

<sup>5</sup> Research Institute on Terrestrial Ecosystems, National Research Council, Via Moruzzi 1, 56124 Pisa, Italy

\*corresponding author: [elianalanfranca.tassi@cnr.it](mailto:elianalanfranca.tassi@cnr.it) (Eliana L. Tassi)

number of pages: 09; Figures: 2; Tables: 3

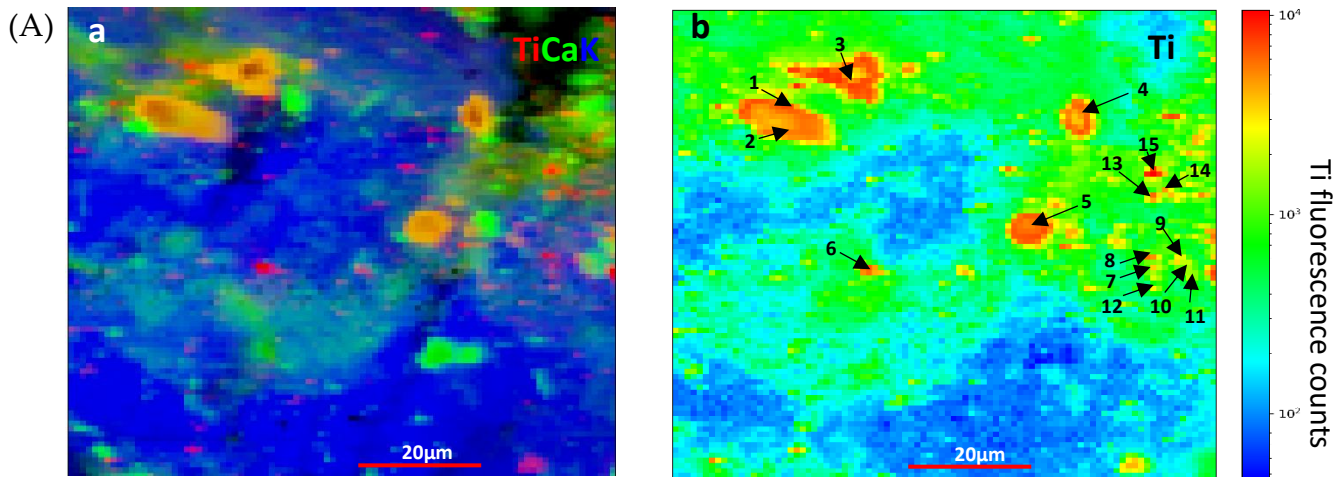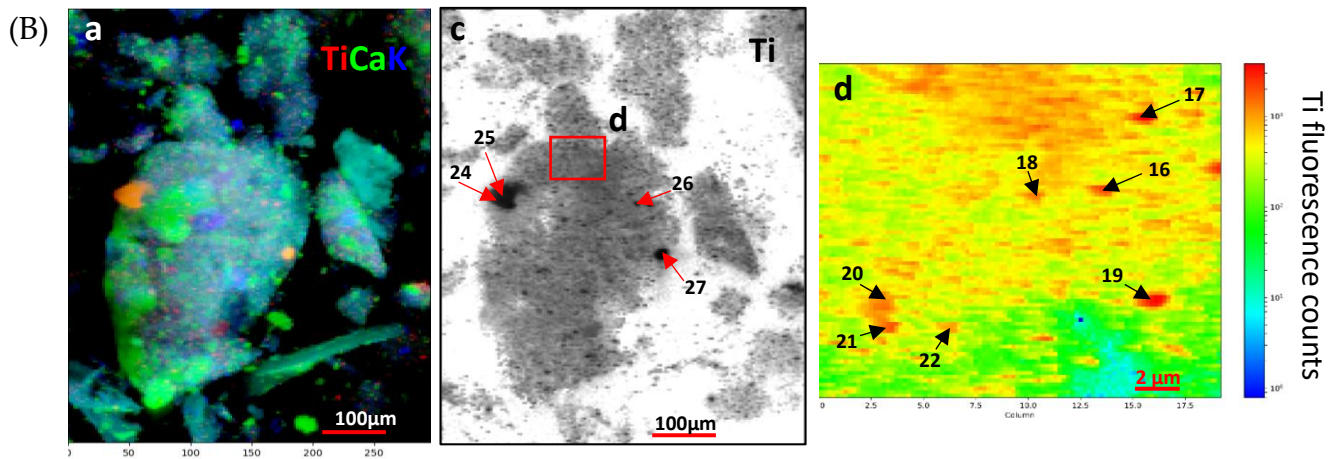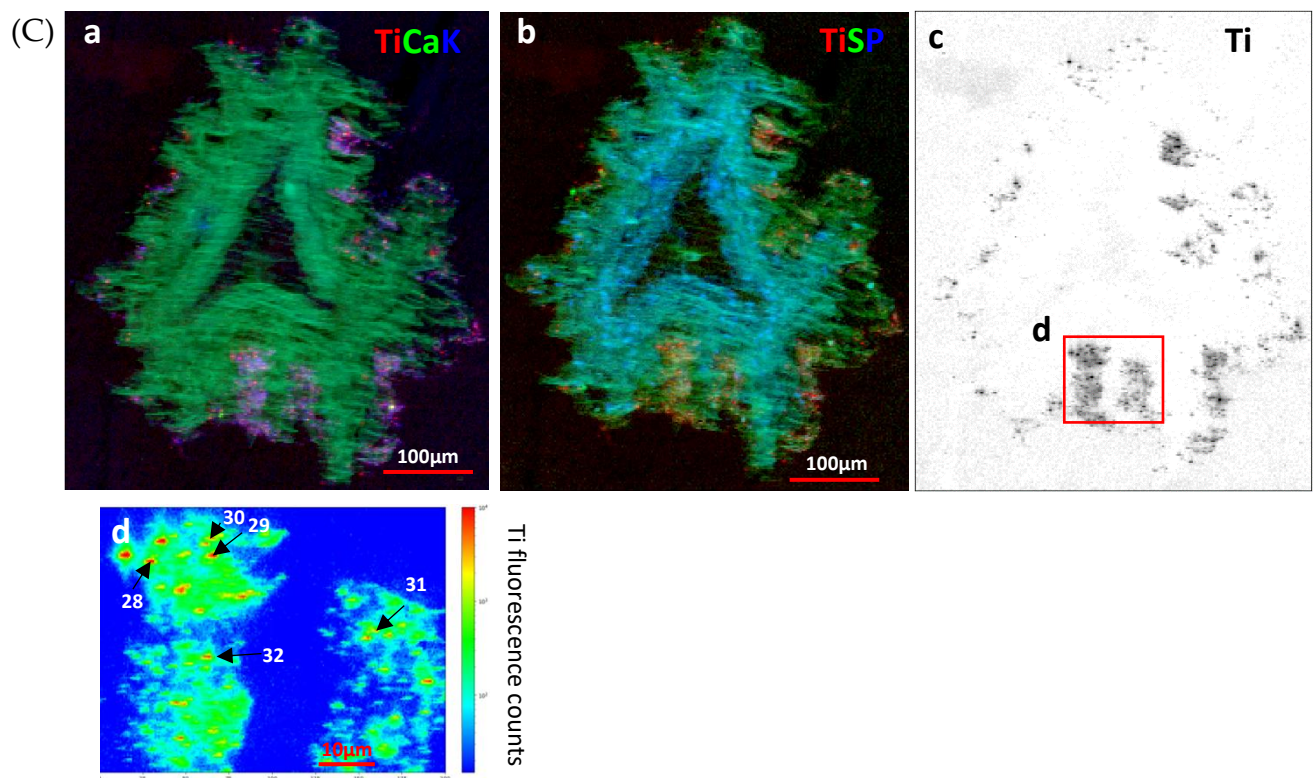

(D)

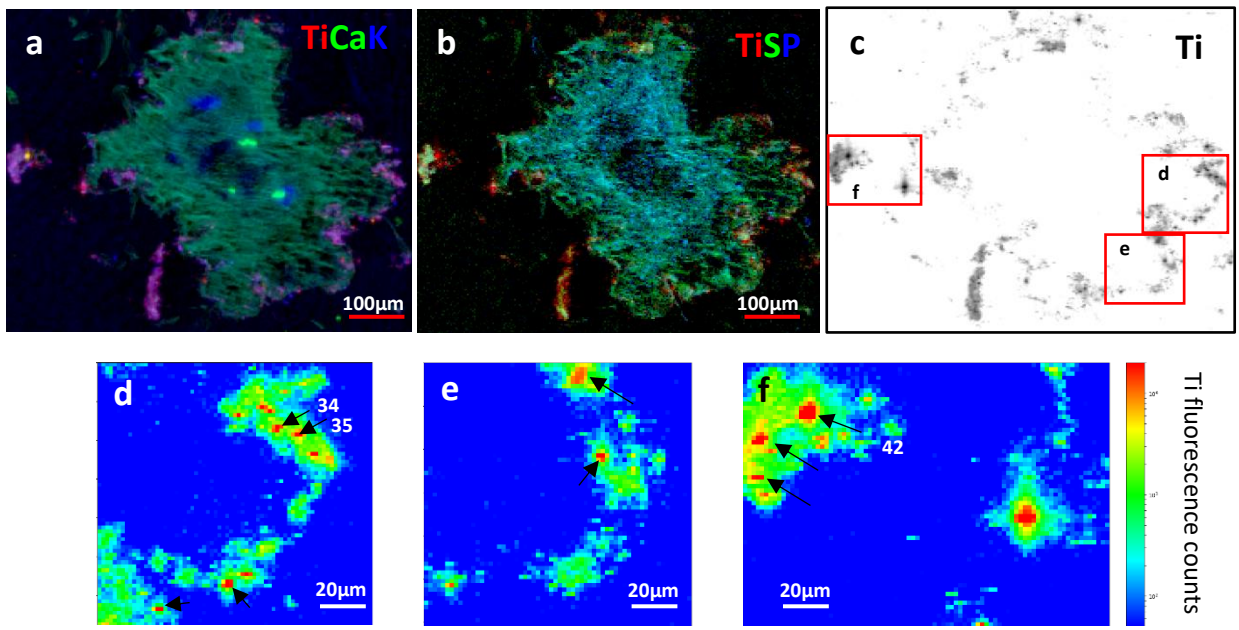

(E)

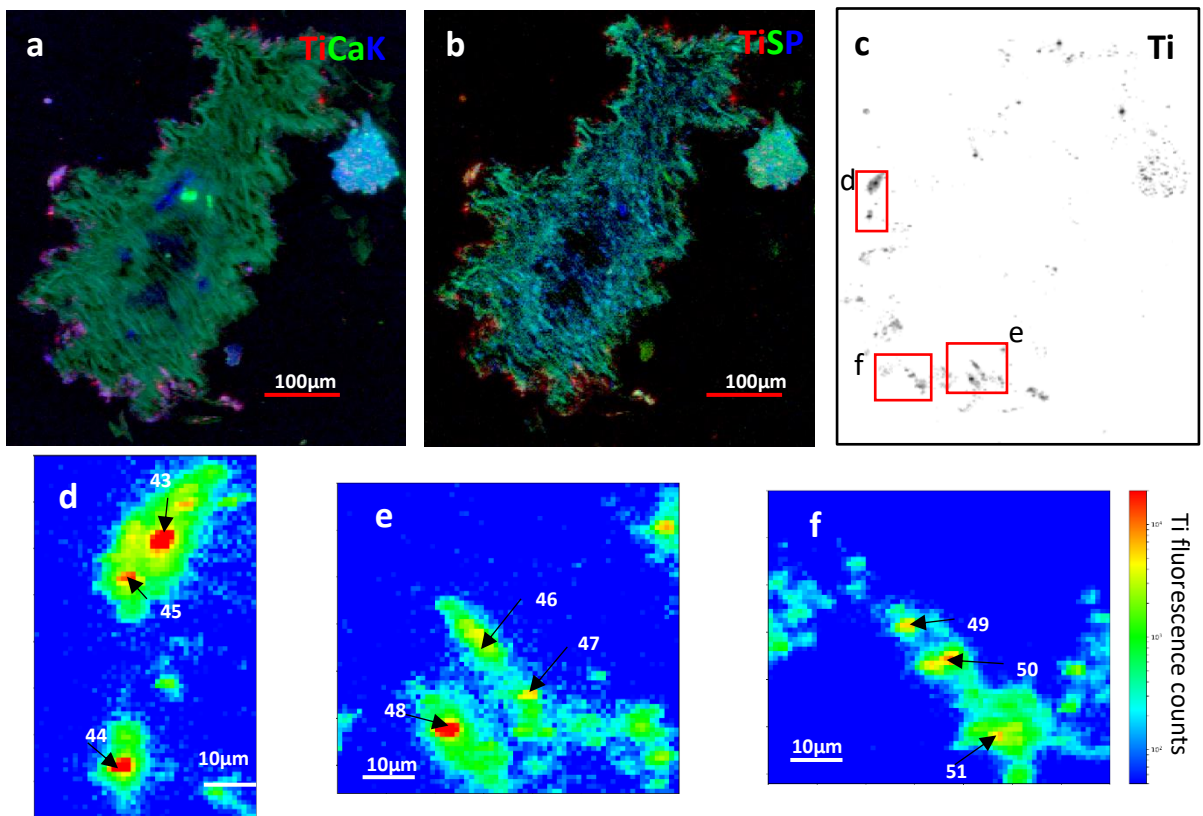



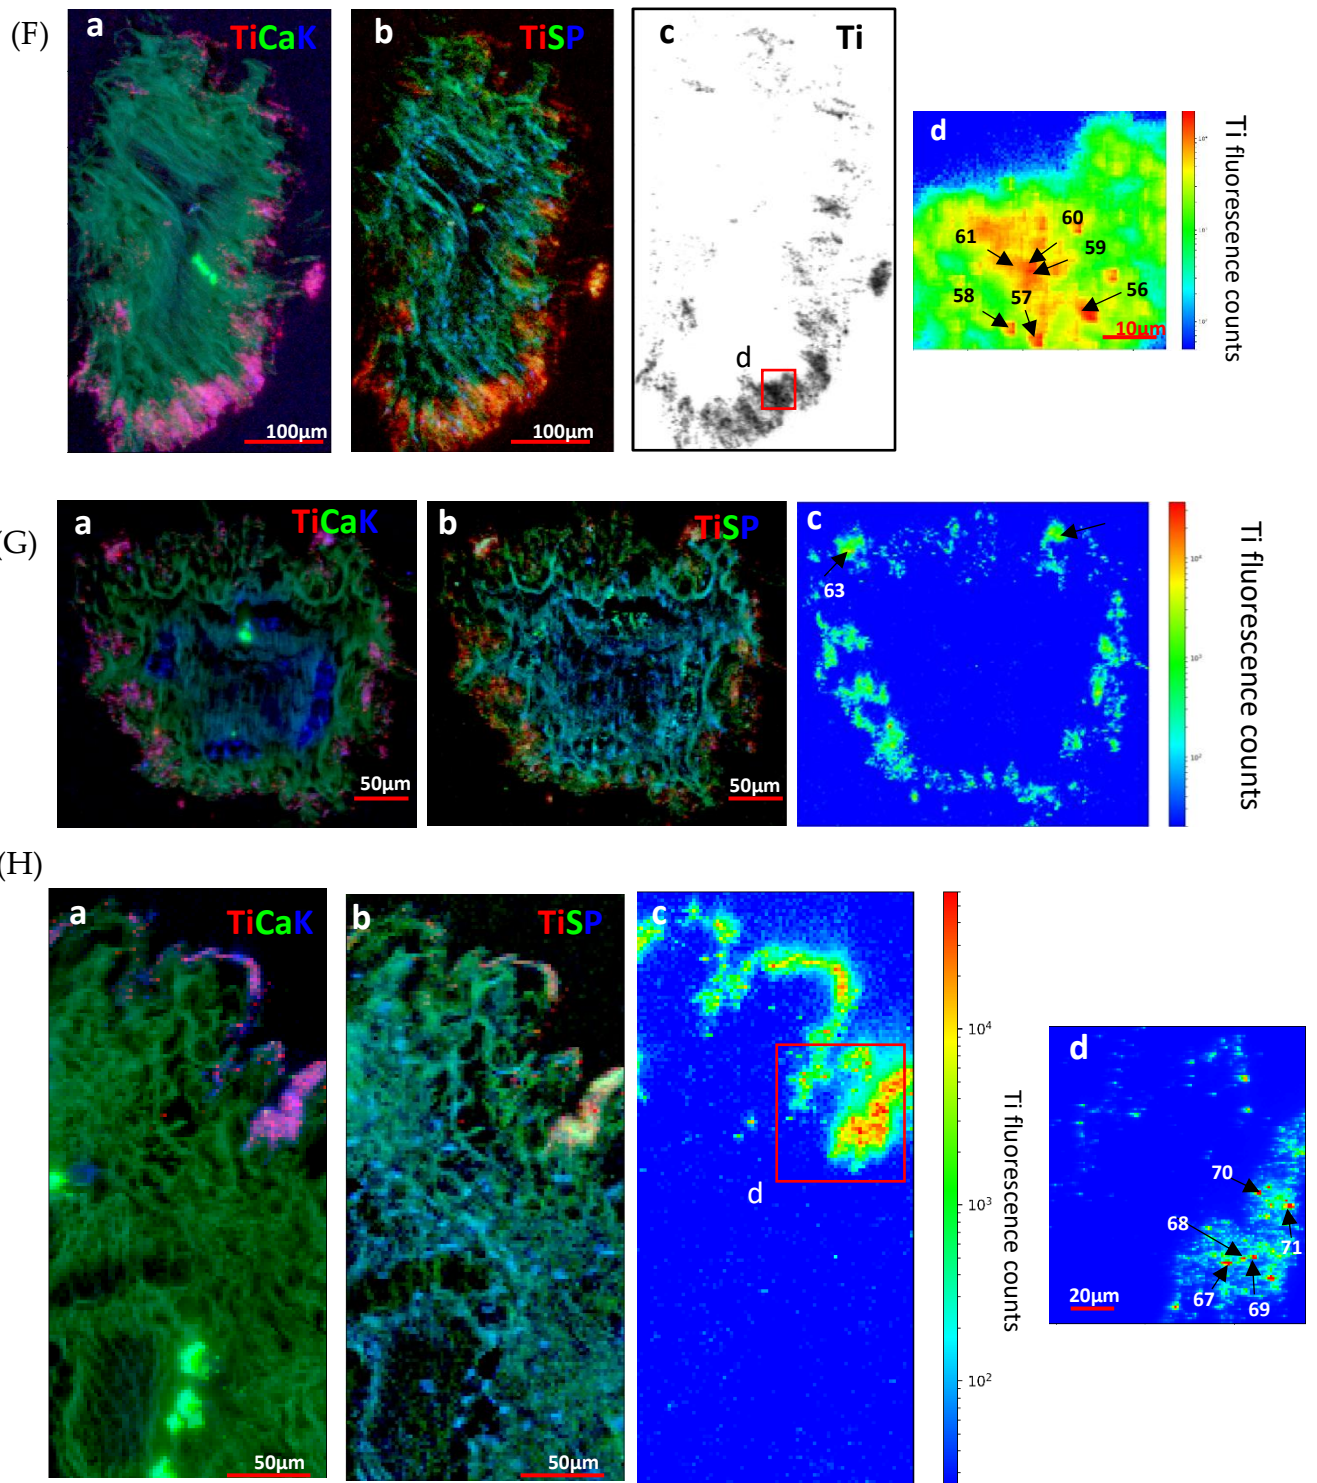

**Figure S1** Tricolor and heat of  $\mu$ XRF maps showing the Ti distribution in all samples. Arrows indicate points where  $\mu$ XANES were collected and numbers correspond to spectrum number indicated in Table S3. Red squares localize the magnified areas used for Ti spots focalization: (A) soil, (B) Bs, (C) control root, (D), (E) Ana800 roots, (F) Rut800 root, (G) Mix800 root, (H) SMP800 root.

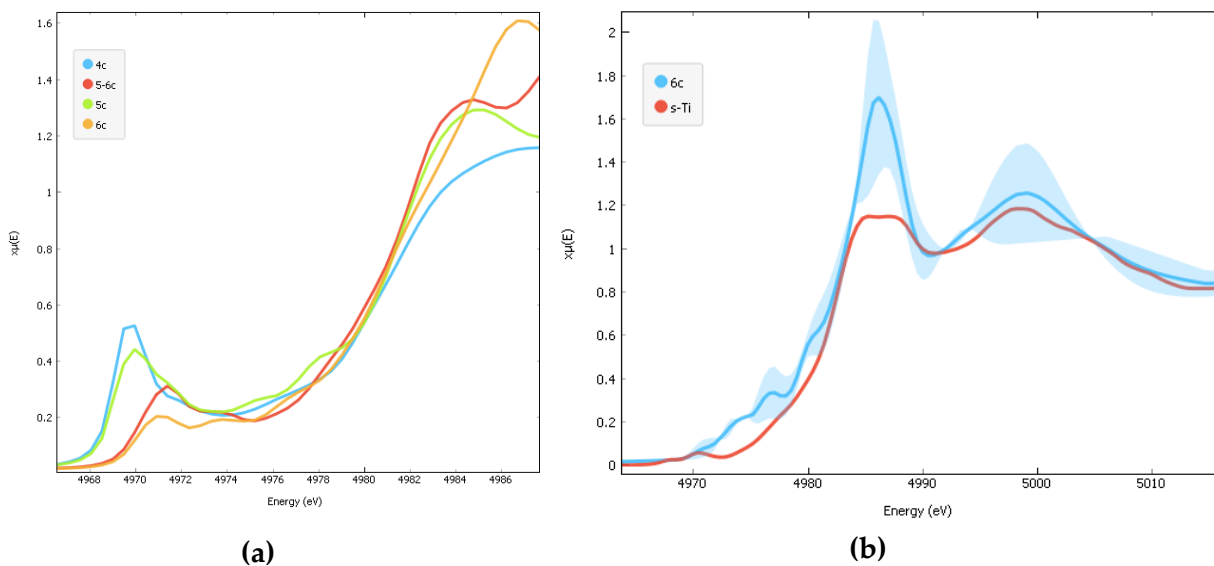

**Figure S2** Pre-peak spectral from theoretical spectra of (a) Ti sites with different coordination numbers (4c, 5c, 6c, 5-6c); (b) spectral comparison of c-Ti with the theoretical spectra from  $\text{Ti}_4(\text{FeO}_4)_3$  (mvc-14970, cubic),  $\text{Ti}_3\text{Fe}_3\text{O}$  (mp-504733, cubic), see Table S1 for more details.

**Table S1** List of Ti-compounds used to obtain theoretical XANES spectra from the <https://materialsproject.org/>. The coordination number (CN) was obtained by observation of the cell

unit structures. The ID number can be used to access all the structural information deposited in this data base.

| Formula                                                                         | ID        | CN   | Tag                                                | Point Group | Crystal System |
|---------------------------------------------------------------------------------|-----------|------|----------------------------------------------------|-------------|----------------|
| Na <sub>2</sub> TiSiO <sub>5</sub>                                              | mp-621926 | 4c   | disodiumtecto-titanosilicate                       | 4/m         | tetragonal     |
| Ba <sub>2</sub> TiO <sub>4</sub>                                                | mp-3397   | 4c   | dibarium titanate                                  | 2/m         | monoclinic     |
| Na <sub>6</sub> Ti <sub>2</sub> O <sub>7</sub>                                  | mp-777423 | 4c   | none                                               | 2/m         | monoclinic     |
| Na <sub>6</sub> Ti <sub>2</sub> O <sub>7</sub>                                  | mp-778364 | 4c   | none                                               | 2/m         | monoclinic     |
| Na <sub>2</sub> Ti <sub>2</sub> O <sub>5</sub>                                  | mp-779729 | 4c   | none                                               | mm2         | orthorhombic   |
| Ti <sub>2</sub> FeO <sub>5</sub>                                                | mp-31857  | 5-6c | iron dititanium oxide                              | mmm         | orthorhombic   |
| TiFe <sub>2</sub> O <sub>5</sub>                                                | mp-24977  | 5-6c | pseudobrookite<br>rubidium 13-                     | mmm         | orthorhombic   |
| Rb <sub>2</sub> Ti <sub>6</sub> O <sub>13</sub>                                 | mp-540784 | 5-6c | oxohexatitanite                                    | 2/m         | monoclinic     |
| Sr <sub>4</sub> Ti <sub>5</sub> (Si <sub>2</sub> O <sub>11</sub> ) <sub>2</sub> | mp-558553 | 5-6c | matsubarite                                        | 2/m         | monoclinic     |
| Na <sub>2</sub> Ti <sub>3</sub> O <sub>7</sub>                                  | mp-3488   | 5-6c | disodium titanate                                  | 2/m         | monoclinic     |
| Na <sub>2</sub> TiSiO <sub>5</sub>                                              | mp-6138   | 5c   | natisite<br>disodium tecto-                        | 4/mmm       | tetragonal     |
| Na <sub>2</sub> TiSiO <sub>5</sub>                                              | mp-555976 | 5c   | titanosilicate                                     | mm2         | orthorhombic   |
| Ba <sub>2</sub> Ti(SiO <sub>4</sub> ) <sub>2</sub>                              | mp-6081   | 5c   | barium titanium silicate<br>dipotassium dititanium | 4mm         | tetragonal     |
| K <sub>2</sub> Ti <sub>2</sub> O <sub>5</sub>                                   | mp-28075  | 5c   | oxide                                              | 2/m         | monoclinic     |
| Rb <sub>2</sub> TiO <sub>3</sub>                                                | mp-5403   | 5c   | dirubidium titanate                                | mmm         | orthorhombic   |
| KNaTiO <sub>3</sub>                                                             | mp-560767 | 5c   | potassium sodium titanate                          | 2/m         | monoclinic     |
| Ba <sub>2</sub> Ti(GeO <sub>4</sub> ) <sub>2</sub>                              | mp-6289   | 5c   | dibarium titanogermanate                           | 4mm         | tetragonal     |
| Na <sub>2</sub> Ti <sub>2</sub> O <sub>5</sub>                                  | mp-779477 | 5c   | none                                               | 2/m         | monoclinic     |
| NaTiO <sub>3</sub>                                                              | mp-977123 | 5c   | none                                               | m-3m        | cubic          |
| TiFeO <sub>3</sub>                                                              | mp-19270  | 6c   | ilmenite                                           | 3m          | trigonal       |
| TiFe <sub>2</sub> O <sub>5</sub>                                                | mp-566709 | 6c   | di-iron(III) titanate                              | 2/m         | monoclinic     |
| Ti(FeO <sub>2</sub> ) <sub>2</sub>                                              | mp-33684  | 6c   | none                                               | mmm         | orthorhombic   |
| TiFe <sub>2</sub> O <sub>5</sub>                                                | mp-19255  | 6c   | di-iron(III) titanium oxide                        | 2/m         | monoclinic     |
| TiFeO <sub>3</sub>                                                              | mp-25002  | 6c   | iron(III) titanate                                 | mmm         | orthorhombic   |
| TiFeO <sub>3</sub>                                                              | mp-19074  | 6c   | iron(III) titanate                                 | mmm         | orthorhombic   |
| Ti <sub>4</sub> (FeO <sub>4</sub> ) <sub>3</sub>                                | mvc-14970 | 6c   | none                                               | m-3         | cubic          |
| Ti <sub>3</sub> Fe <sub>7</sub> O <sub>15</sub>                                 | mp-34287  | 6c   | none                                               | m           | monoclinic     |
| Ti <sub>3</sub> Fe <sub>3</sub> O                                               | mp-504733 | 6c   | iron titanium oxide                                | m-3m        | cubic          |
| Ti(FeO <sub>2</sub> ) <sub>4</sub>                                              | mp-35482  | 6c   | none                                               | 2/m         | monoclinic     |
| Ti <sub>2</sub> Fe <sub>4</sub> O <sub>9</sub>                                  | mp-766757 | 6c   | none                                               | m           | monoclinic     |
| Na <sub>2</sub> TiSi <sub>4</sub> O <sub>11</sub>                               | mp-556283 | 6c   | sodium titanium silicate                           | 4/m         | tetragonal     |
| Na <sub>2</sub> Ti <sub>2</sub> Si <sub>2</sub> O <sub>9</sub>                  | mp-5996   | 6c   | ramsayite                                          | mmm         | orthorhombic   |
| NaTi <sub>2</sub> O <sub>4</sub>                                                | mp-29356  | 6c   | none                                               | mmm         | orthorhombic   |
| Na <sub>4</sub> Ti <sub>5</sub> O <sub>12</sub>                                 | mp-555678 | 6c   | none                                               | -3          | trigonal       |
| TiO <sub>2</sub>                                                                | mp-390    | 6c   | anatase                                            | 4/mmm       | tetragonal     |
| TiO <sub>2</sub>                                                                | mp-2657   | 6c   | rutile                                             | 4/mmm       | tetragonal     |
| TiO <sub>2</sub>                                                                | mp-1840   | 6c   | brookite                                           | mmm         | orthorhombic   |

**Table S2** Confusion matrix from the logistic regression model performed with the experimental data from plants, soils and biosolid. The target category used was created from the PCA groups obtained from the data and named Rut (rutile like), Ana (anatase like), Ilm (ilmenite like) and s-Ti (Ti-containing compound from soil).

|        |      | Predicted |     |     |      | sum |
|--------|------|-----------|-----|-----|------|-----|
|        |      | Ana       | Ilm | Rut | s-Ti |     |
| Actual | Ana  | 38        | 1   | 1   | 0    | 40  |
|        | Ilm  | 0         | 10  | 0   | 2    | 12  |
|        | Rut  | 2         | 0   | 14  | 0    | 16  |
|        | s-Ti | 1         | 0   | 0   | 4    | 5   |
|        | sum  | 41        | 11  | 15  | 6    |     |

**Table S3** List of spectrum numbers used to indicate the locations in the  $\mu$ XRF map (Figure S1 A-H). Treatment and phase (according to PCA grouping is included). Missing numbers are from spectra used in the PCA model but specific map location was not possible to be attributed; \* indicates spectra from soil sample that was analyzed a second time, the spectra was considered as another point in the sample as this was repeated several hours after the relocation precision is then not precise to  $\mu$ m.

| Spectrum # | Treatment | Phase  | Figure S1 |
|------------|-----------|--------|-----------|
| 1          | soil      | s-Ti * | (A)       |
| 2          | soil      | s-Ti * | (A)       |
| 3          | soil      | Ilm    | (A)       |
| 4          | soil      | Ilm    | (A)       |
| 5          | soil      | s-Ti   | (A)       |
| 6          | soil      | Ana    | (A)       |
| 7          | soil      | Ana    | (A)       |
| 8          | soil      | Ana    | (A)       |
| 9          | soil      | Rut    | (A)       |
| 10         | soil      | Rut    | (A)       |
| 11         | soil      | Rut    | (A)       |
| 12         | soil      | Ana    | (A)       |
| 13         | soil      | Ana    | (A)       |
| 14         | soil      | Ilm    | (A)       |
| 15         | soil      | Ana    | (A)       |
| 16         | biosolid  | Rut    | (B)       |
| 17         | biosolid  | Rut    | (B)       |
| 18         | biosolid  | Ana    | (B)       |
| 19         | biosolid  | Rut    | (B)       |
| 20         | biosolid  | Rut    | (B)       |
| 21         | biosolid  | Rut    | (B)       |
| 22         | biosolid  | Rut    | (B)       |
| 23         | biosolid  | Ana    | (B)       |
| 24         | biosolid  | Ilm    | (B)       |
| 25         | biosolid  | Ilm    | (B)       |
| 26         | biosolid  | Ilm    | (B)       |
| 27         | biosolid  | Ilm    | (B)       |
| 28         | C         | Ana    | (C)       |
| 29         | C         | Ilm    | (C)       |
| 30         | C         | Ana    | (C)       |
| 31         | C         | Ana    | (C)       |
| 32         | C         | Ana    | (C)       |
|            | C         | Ana    | (C)       |
| 34         | Ana800    | Ilm    | (D)       |
| 35         | Ana800    | Ana    | (D)       |
| 36         | Ana800    | Ilm    | (D)       |



|    |        |     |     |
|----|--------|-----|-----|
| 37 | Ana800 | Ana | (D) |
| 38 | Ana800 | Ilm | (D) |
| 39 | Ana800 | Ana | (D) |
| 40 | Ana800 | Rut | (D) |
| 41 | Ana800 | Ana | (D) |
| 42 | Ana800 | Ilm | (D) |
| 43 | Ana800 | Rut | (E) |
| 44 | Ana800 | Ana | (E) |
| 45 | Ana800 | Ana | (E) |
| 46 | Ana800 | Ana | (E) |
| 47 | Ana800 | Ana | (E) |
| 48 | Ana800 | Ana | (E) |
| 49 | Ana800 | Ana | (E) |
| 50 | Ana800 | Ana | (E) |
| 51 | Ana800 | Ana | (E) |
|    | Ana800 | Ana | (E) |
|    | Ana800 | ilm | (E) |
|    | Ana800 | Rut | (E) |
|    | Ana800 | Ana | (E) |
| 56 | Rut800 | Ana | (F) |
| 57 | Rut800 | Ana | (F) |
| 58 | Rut800 | Ana | (F) |
| 59 | Rut800 | Rut | (F) |
| 60 | Rut800 | Rut | (F) |
| 61 | Rut800 | Rut | (F) |
| 62 | Rut800 | Rut | (F) |
| 63 | Mix800 | Ana | (G) |
| 64 | Mix800 | Ana | (G) |
| 65 | Mix800 | Ana | (G) |
| 66 | Mix800 | Ana | (G) |
| 67 | SMP800 | Ana | (H) |
| 68 | SMP800 | Ana | (H) |
| 69 | SMP800 | Ana | (H) |
|    | SMP800 | Ana | (H) |
| 71 | SMP800 | Ana | (H) |
